# Supplementary material for: An Inducible Microbacterium Prophage vB_MoxS-R1 Represents a Novel Lineage of Siphovirus
Source: MDPI journal article supplement (doi:10.3390/v14040731), 2022-03-31
Supplement: s1 [file s1]

## Supplementary Material

Table S1. Increased vB\_MoxS-R1 *mcp* copies in phage-treated *Microbacterium oxydans* R1, CBW1101-8 and CBW1101-9 cells.

| Tested strain                       | Time (h) | Control (copies cell <sup>-1</sup> ) | Phage treated (copies cell <sup>-1</sup> ) | Increased ratio (%) |
|-------------------------------------|----------|--------------------------------------|--------------------------------------------|---------------------|
| <i>Microbacterium</i> sp. R1        | 0.5      | 1.05                                 | 1.38                                       | 31                  |
|                                     | 2        | 2.94                                 | 4.01                                       | 36                  |
|                                     | 4        | 1.95                                 | 2.62                                       | 34                  |
| <i>Microbacterium</i> sp. CBW1101-8 | 0.5      | 0.70                                 | 0.75                                       | 7                   |
|                                     | 2        | 3.29                                 | 4.13                                       | 26                  |
|                                     | 4        | 2.56                                 | 2.83                                       | 11                  |
| <i>Microbacterium</i> sp. CBW1101-9 | 0.5      | 0.42                                 | 0.53                                       | 26                  |
|                                     | 2        | 0.42                                 | 0.61                                       | 45                  |
|                                     | 4        | 0.36                                 | 0.54                                       | 50                  |

Table S2. Annotation of the predicted vB\_MoxS-R1 ORFs with homologs in the GenBank non-redundant database.

| Gene | Strand | Left  | Right | Length (aa) | Significant hits in NR <sup>a</sup>                                                            | Putative function <sup>b</sup> | E-value | aa identity | Conserved domain (e-value) <sup>c</sup> |
|------|--------|-------|-------|-------------|------------------------------------------------------------------------------------------------|--------------------------------|---------|-------------|-----------------------------------------|
| 1    | +      | 170   | 1447  | 425         | hypothetical protein D514_0102395 [ <i>Microbacterium</i> sp. UCD-TDU]                         | integrase                      | 0       | 95.06%      | cd01189 (3.87E-12)                      |
|      |        |       |       |             | tyrosine-type recombinase/integrase [ <i>Microbacterium</i> sp. UCD-TDU]                       |                                | 0       | 95.05%      |                                         |
|      |        |       |       |             | integrase [ <i>Microbacterium oleivorans</i> ]                                                 |                                | 2 E-120 | 58.47%      |                                         |
| 2    | -      | 1500  | 1952  | 150         | ImmA/IrrE family metallo-endopeptidase [ <i>Microbacterium</i> sp. 4-7]                        | metallo-endopeptidase          | 4 E-71  | 73.10%      | cl01076 (4.40E-04)                      |
|      |        |       |       |             | ImmA/IrrE family metallo-endopeptidase [ <i>Mycetocola reblochon</i> ]                         |                                | 2 E-60  | 64.34%      |                                         |
| 3    | -      | 1949  | 2521  | 190         | hypothetical protein [ <i>Microbacterium</i> sp. UCD-TDU]                                      | transcriptional regulator      | 3 E-101 | 82.61%      |                                         |
|      |        |       |       |             | helix-turn-helix transcriptional regulator [ <i>Microbacterium</i> sp. K24]                    |                                | 3 E-35  | 46.84%      |                                         |
| 5    | +      | 2883  | 3686  | 267         | helix-turn-helix domain-containing protein [ <i>Curtobacterium</i> sp. MCB17_021]              | transcriptional regulator      | 7 E-55  | 43.82%      |                                         |
|      |        |       |       |             | hypothetical protein C7321_0396 [ <i>Microbacterium trichothecenolyticum</i> ]                 |                                | 1 E-40  | 36.86%      |                                         |
|      |        |       |       |             | ArsR family transcriptional regulator [ <i>Mycobacterium asiaticum</i> ]                       |                                | 1 E-17  | 44.35%      |                                         |
| 7    | +      | 4546  | 4767  | 73          | helix-turn-helix domain-containing protein [ <i>Microbacterium</i> sp. UCD-TDU]                | DNA binding                    | 1 E-38  | 87.67%      | pfam12728 (2.25E-05)                    |
|      |        |       |       |             | DNA-binding protein [ <i>Microbacterium</i> sp. HSID17254]                                     |                                | 2 E-27  | 75.38%      |                                         |
| 13   | +      | 6173  | 6955  | 260         | HNH endonuclease [ <i>Agromyces albus</i> ]                                                    | endonuclease                   | 3 E-30  | 32.97%      | pfam01844 (1.97E-07)                    |
|      |        |       |       |             | HNH endonuclease [ <i>Microbacterium</i> sp. CGR2]                                             |                                | 1 E-12  | 52.31%      |                                         |
| 20   | +      | 8928  | 9821  | 297         | hypothetical protein [ <i>Microbacterium</i> sp. K5D]                                          | exonuclease VIII               | 0       | 94.61%      | cl00641 (1.03E-20)                      |
|      |        |       |       |             | PDDEXK-like uncharacterized protein DUF3799 [ <i>Microbacterium lindanitolerans</i> ]          |                                | 1 E-64  | 42.07%      |                                         |
|      |        |       |       |             | recE [ <i>Curtobacterium</i> sp. MCSS17_006]                                                   |                                | 2 E-60  | 40.68%      |                                         |
| 22   | +      | 9957  | 10559 | 200         | MULTISPECIES: helix-turn-helix transcriptional regulator [unclassified <i>Microbacterium</i> ] | transcriptional regulator      | 3 E-131 | 92.00%      | cd00093 (7.62E-06)                      |
| 23   | +      | 10646 | 10834 | 62          | HNH endonuclease [ <i>Microbacterium oxydans</i> ]                                             | endonuclease                   | 1 E-38  | 98.39%      | cl00083 (5.14E-05)                      |
| 24   | +      | 10837 | 11331 | 164         | ASCH domain-containing protein [ <i>Mycetocola reblochon</i> ]                                 | transcription factor           | 1 E-40  | 56.36%      | cd06554 (8.44E-22)                      |
|      |        |       |       |             | hypothetical protein [ <i>Microbacterium</i> sp. 4NA327F11]                                    |                                | 1 E-38  | 52.76%      |                                         |
| 26   | +      | 11558 | 12112 | 184         | MULTISPECIES: hypothetical protein [unclassified <i>Microbacterium</i> ]                       | DNA binding                    | 1 E-132 | 97.83%      |                                         |
|      |        |       |       |             | helix-turn-helix DNA binding domain protein [ <i>Gordonia</i> phage Fairfaxidum]               |                                | 4 E-47  | 45.61%      |                                         |
|      |        |       |       |             | helix-turn-helix DNA binding domain protein [ <i>Rhodococcus</i> phage Whack]                  |                                | 4 E-38  | 40.80%      |                                         |
| 27   | +      | 12285 | 12587 | 100         | helix-turn-helix domain-containing protein [ <i>Microbacterium</i> sp. Leaf320]                | DNA binding                    | 5 E-46  | 71.88%      | cl21459 (6.70E-07)                      |

Table S2. Continued.

| Gene | Strand | Left  | Right | Length (aa) | Significant hits in NR <sup>a</sup>                                            | Putative function <sup>b</sup> | E-value | aa identity | Conserved domain (e-value) <sup>c</sup> |
|------|--------|-------|-------|-------------|--------------------------------------------------------------------------------|--------------------------------|---------|-------------|-----------------------------------------|
| 28   | +      | 12584 | 13096 | 170         | hypothetical protein [ <i>Microbacterium</i> sp. H6]                           | transcription factor           | 3 E-85  | 88.95%      |                                         |
|      |        |       |       |             | response regulator transcription factor [ <i>Microbacterium</i> sp. No. 7]     |                                | 2 E-12  | 39.24%      |                                         |
|      |        |       |       |             | Helix-turn-helix domain of resolvase [ <i>Microbacterium paraoxydans</i> ]     |                                | 2 E-11  | 39.04%      |                                         |
| 29   | +      | 13093 | 13833 | 246         | DNA (cytosine-5-)-methyltransferase [ <i>Agromyces lapidis</i> ]               | DNA methyltransferase          | 8 E-102 | 61.57%      | cl30459 (1.08E-45)                      |
|      |        |       |       |             | methyltransferase [ <i>Mycobacterium</i> phage Zerg]                           |                                | 4 E-93  | 60.25%      |                                         |
| tRNA | +      | 16814 | 16887 |             | tRNA-Ala                                                                       |                                |         |             |                                         |
| 38   | +      | 17288 | 17542 | 84          | hypothetical protein E6R04_05360 [ <i>Spirochaetes bacterium</i> ]             | membrane protein               | 1 E-30  | 76.39%      |                                         |
|      |        |       |       |             | membrane protein [ <i>Microbacterium</i> phage Squash]                         |                                | 1 E-20  | 54.88%      |                                         |
| 41   | +      | 17866 | 18171 | 101         | hypothetical protein FB466_0640 [ <i>Klugiella xanthotipulae</i> ]             | endonuclease                   | 9 E-29  | 68.69%      |                                         |
|      |        |       |       |             | HNH endonuclease [ <i>bacterium</i> ]                                          |                                | 1 E-06  | 37.68%      |                                         |
| 43   | +      | 18884 | 19480 | 198         | HNH endonuclease [ <i>Rhodococcus fascians</i> ]                               | endonuclease                   | 3 E-51  | 50.87%      | pfam01844 (6.28E-08)                    |
|      |        |       |       |             | HNH endonuclease [ <i>Microbacterium</i> sp. CH12i]                            |                                | 4 E-18  | 44.68%      |                                         |
| 44   | +      | 19556 | 19726 | 56          | MULTISPECIES: terminase [unclassified <i>Microbacterium</i> ]                  | terminase                      | 1 E-27  | 91.07%      |                                         |
| 45   | +      | 19713 | 21167 | 484         | MULTISPECIES: terminase [unclassified <i>Microbacterium</i> ]                  | terminase                      | 0       | 99.38%      |                                         |
|      |        |       |       |             | terminase [ <i>Microbacterium telephonicum</i> ]                               |                                | 0       | 72.34%      |                                         |
|      |        |       |       |             | Phage terminase-like protein%2C large subunit [ <i>Chlamydia trachomatis</i> ] |                                | 0       | 61.24%      |                                         |
| 46   | +      | 21179 | 22495 | 438         | MULTISPECIES: phage portal protein [unclassified <i>Microbacterium</i> ]       | portal protein                 | 0       | 97.49%      | cl19531 (2.97E-10)                      |
| 47   | +      | 22479 | 23288 | 269         | MULTISPECIES: hypothetical protein [unclassified <i>Microbacterium</i> ]       | capsid maturation protease     | 0       | 96.28%      |                                         |
|      |        |       |       |             | capsid maturation protease [ <i>Mycobacterium</i> phage Llama]                 |                                | 1 E-63  | 42.69%      |                                         |
| 49   | +      | 23937 | 25148 | 403         | MULTISPECIES: hypothetical protein [unclassified <i>Microbacterium</i> ]       | major capsid protein           | 0       | 98.01%      | cl22542 (2.23E-08)                      |
|      |        |       |       |             | major capsid protein [ <i>Mycobacterium</i> phage Bromden]                     |                                | 3 E-48  | 35.00%      |                                         |
| 53   | +      | 26318 | 26713 | 131         | hypothetical protein BGN97_00240 [ <i>Microbacterium</i> sp. 69-10]            | head-to-tail connector complex | 2 E-18  | 40.46%      |                                         |
|      |        |       |       |             | head-to-tail connector complex protein [ <i>Streptomyces</i> phage Rowa]       |                                | 2 E-06  | 29.23%      |                                         |
| 58   | +      | 28682 | 31627 | 981         | tape measure protein [ <i>Microbacterium</i> sp. ZXX196]                       | tail tape measure              | 0       | 59.20%      | cl34696 (2.73E-07)                      |
| 59   | +      | 31624 | 33081 | 485         | hypothetical protein NS234_04900 [ <i>Microbacterium oxydans</i> ]             | tail protein                   | 0       | 99.79%      |                                         |
|      |        |       |       |             | minor tail protein [ <i>Microbacterium</i> phage VitulaEligans]                |                                | 5 E-32  | 39.38%      |                                         |
| 63   | +      | 35727 | 36509 | 260         | hypothetical protein [ <i>Microbacterium</i> sp. H6]                           | lysin A                        | 3 E-91  | 60.00%      |                                         |
|      |        |       |       |             | lysin A [ <i>Microbacterium</i> phage Chepli]                                  |                                | 9 E-76  | 50.80%      |                                         |

Table S2. Continued.

| Gene | Strand | Left  | Right | Length (aa) | Significant hits in NR <sup>a</sup>                                                  | Putative function <sup>b</sup>          | E-value | aa identity | Conserved domain (e-value) <sup>c</sup> |
|------|--------|-------|-------|-------------|--------------------------------------------------------------------------------------|-----------------------------------------|---------|-------------|-----------------------------------------|
| 65   | +      | 36877 | 37512 | 211         | hypothetical protein [ <i>Microbacterium</i> sp. K24]                                | collagen                                | 5 E-52  | 53.88%      | pfam01391 (1.20E-04)                    |
|      |        |       |       |             | collagen-like protein [ <i>Microbacterium</i> sp. PF5]                               |                                         | 6 E-51  | 56.54%      |                                         |
| 66   | +      | 37509 | 37853 | 114         | hypothetical protein [ <i>Microbacterium</i> sp. H6]                                 | metallopeptidase                        | 1 E-69  | 98.25%      |                                         |
|      |        |       |       |             | M15 family metallopeptidase [ <i>Nocardioides</i> sp. W3-2-3]                        |                                         | 1 E-05  | 47.50%      |                                         |
| 68   | +      | 38244 | 40118 | 624         | MULTISPECIES: hypothetical protein [unclassified <i>Microbacterium</i> ]             | glycerophosphodiester phosphodiesterase | 0       | 95.35%      | cl14615 (4.68E-15)                      |
|      |        |       |       |             | glycerophosphodiester phosphodiesterase [ <i>Microbacterium</i> phage ValentiniPuff] |                                         | 0       | 58.15%      |                                         |
|      |        |       |       |             | phosphoesterase [ <i>Microbacterium</i> phage Triscuit]                              |                                         | 1 E-58  | 48.41%      |                                         |
| 71   | -      | 40725 | 41066 | 113         | hypothetical protein [ <i>Kocuria palustris</i> ]                                    | membrane protein                        | 1 E-13  | 0.4432      |                                         |
|      |        |       |       |             | Predicted membrane protein [ <i>Chlamydia trachomatis</i> ]                          |                                         | 1 E-8   | 0.3158      |                                         |
| 73   | -      | 41395 | 41592 | 65          | XRE family transcriptional regulator [ <i>Microbacterium liquefaciens</i> ]          | transcriptional regulator               | 5 E-29  | 81.25%      |                                         |
| tRNA | +      | 42493 | 42559 |             | Pseudo tRNA-Thr                                                                      |                                         |         |             |                                         |

<sup>a</sup> The displayed top homolog and additional homologs for each different organism type are based on the BLASTP against the non-redundant database. <sup>b</sup> Putative functions were predicted on the basis of functions of homologs identified from the non-redundant and Conserved Domain Databases. <sup>c</sup> The best hit of each ORF in the Conserved Domain Database and its e-value.

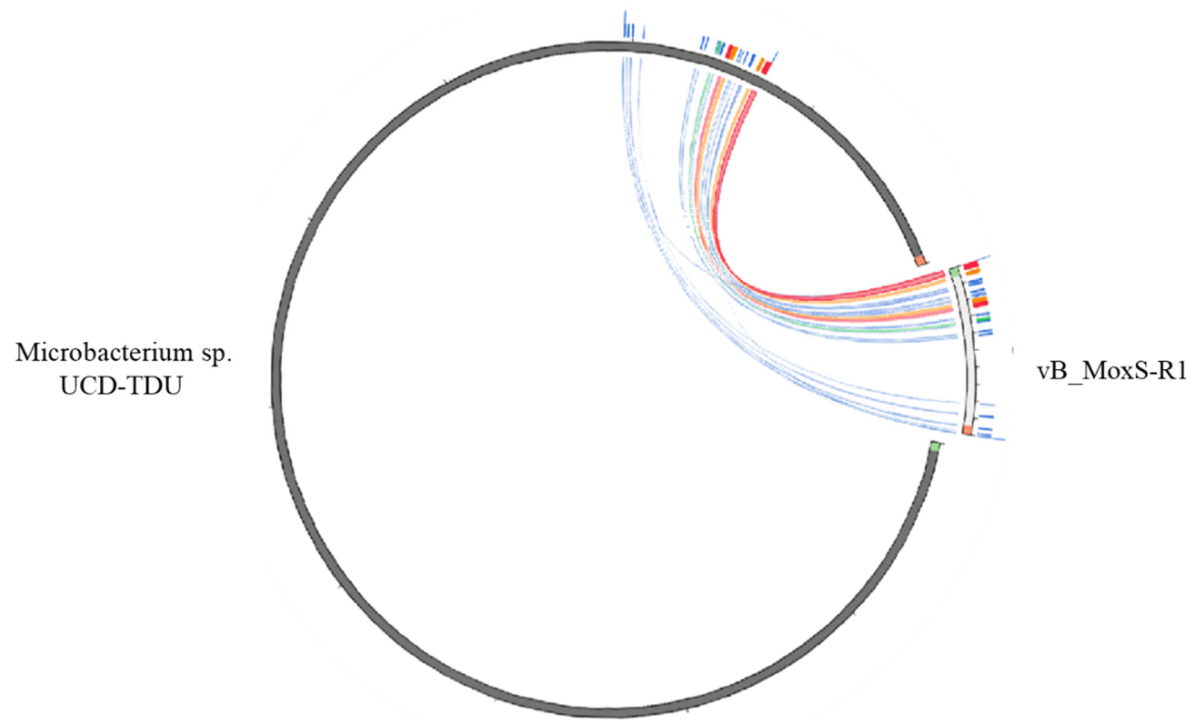

Figure S1. Genome sequence comparison of vB\_MoxS-R1 and *Microbacterium* sp. UCD-TDU using Circoletto (<http://tools.bat.infspire.org/circoletto/> (accessed on 12 March 2020)).

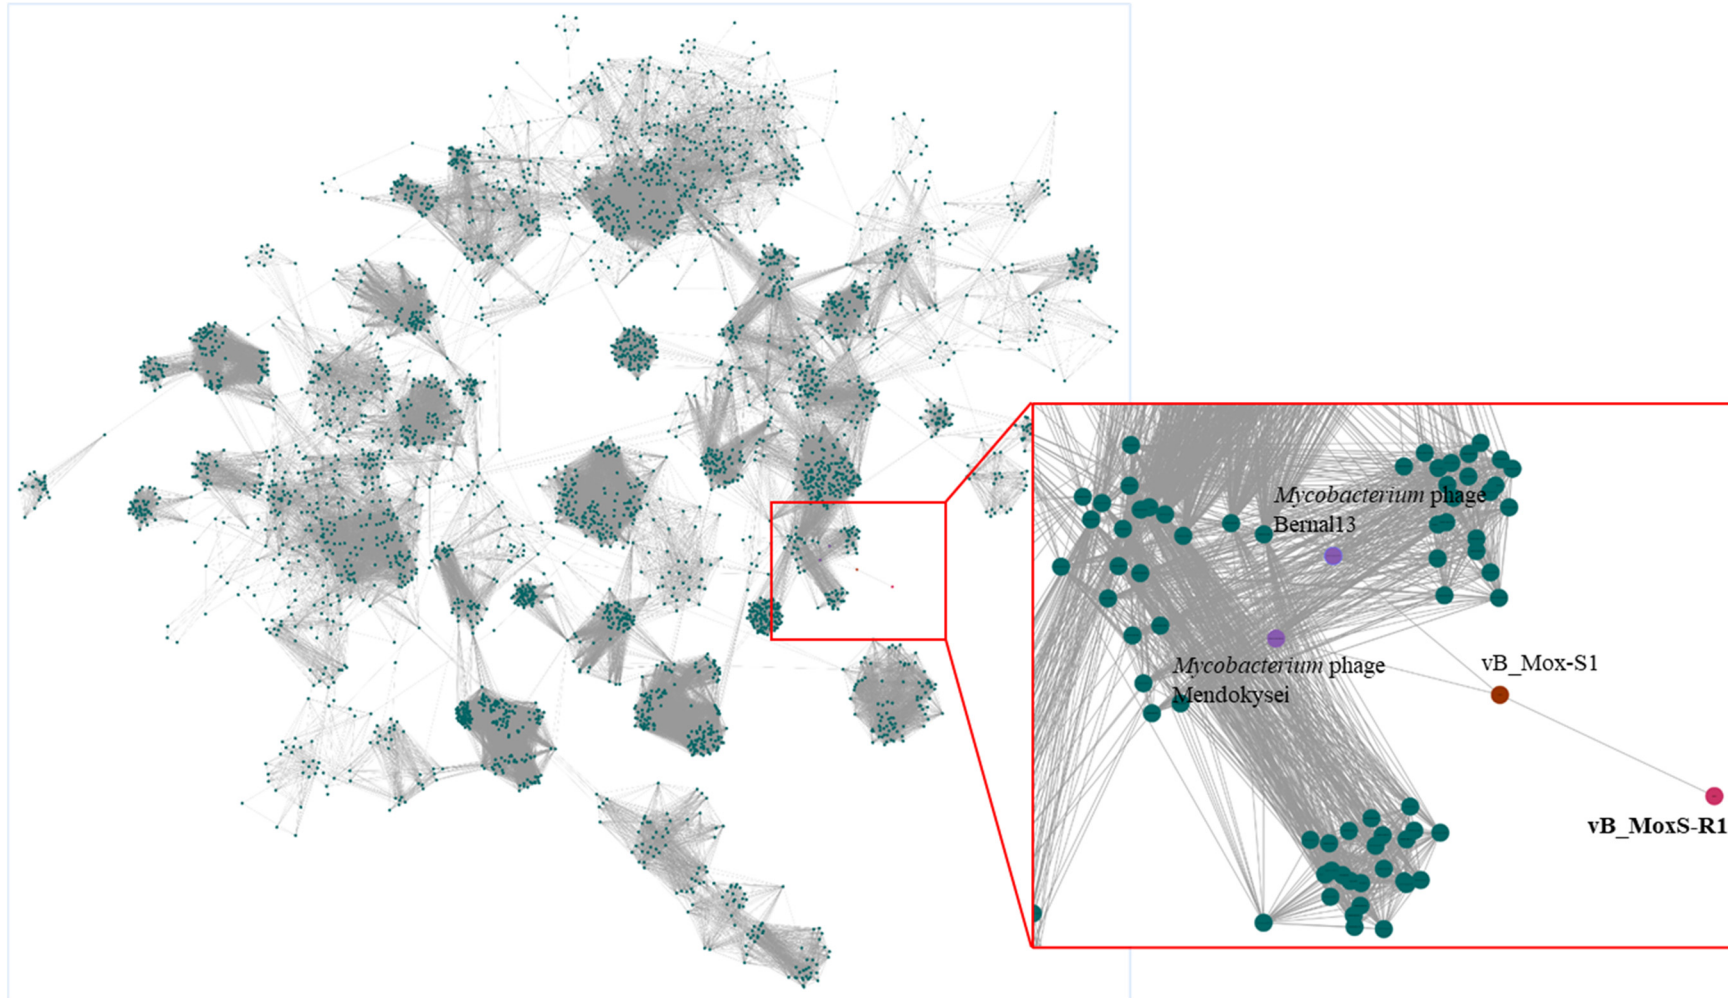

Figure S2. Protein-sharing viral network of vB\_MoxS-R1, vB\_Mox-S1 and ViralRefSeq database viruses with a pairing-similarity score  $> 1$ . Each node represents the genome of a phage. Edges represent interaction between pairs of viruses. The nodes of vB\_MoxS-R1, vB\_Mox-S1 and their related phages are colored in different colors.

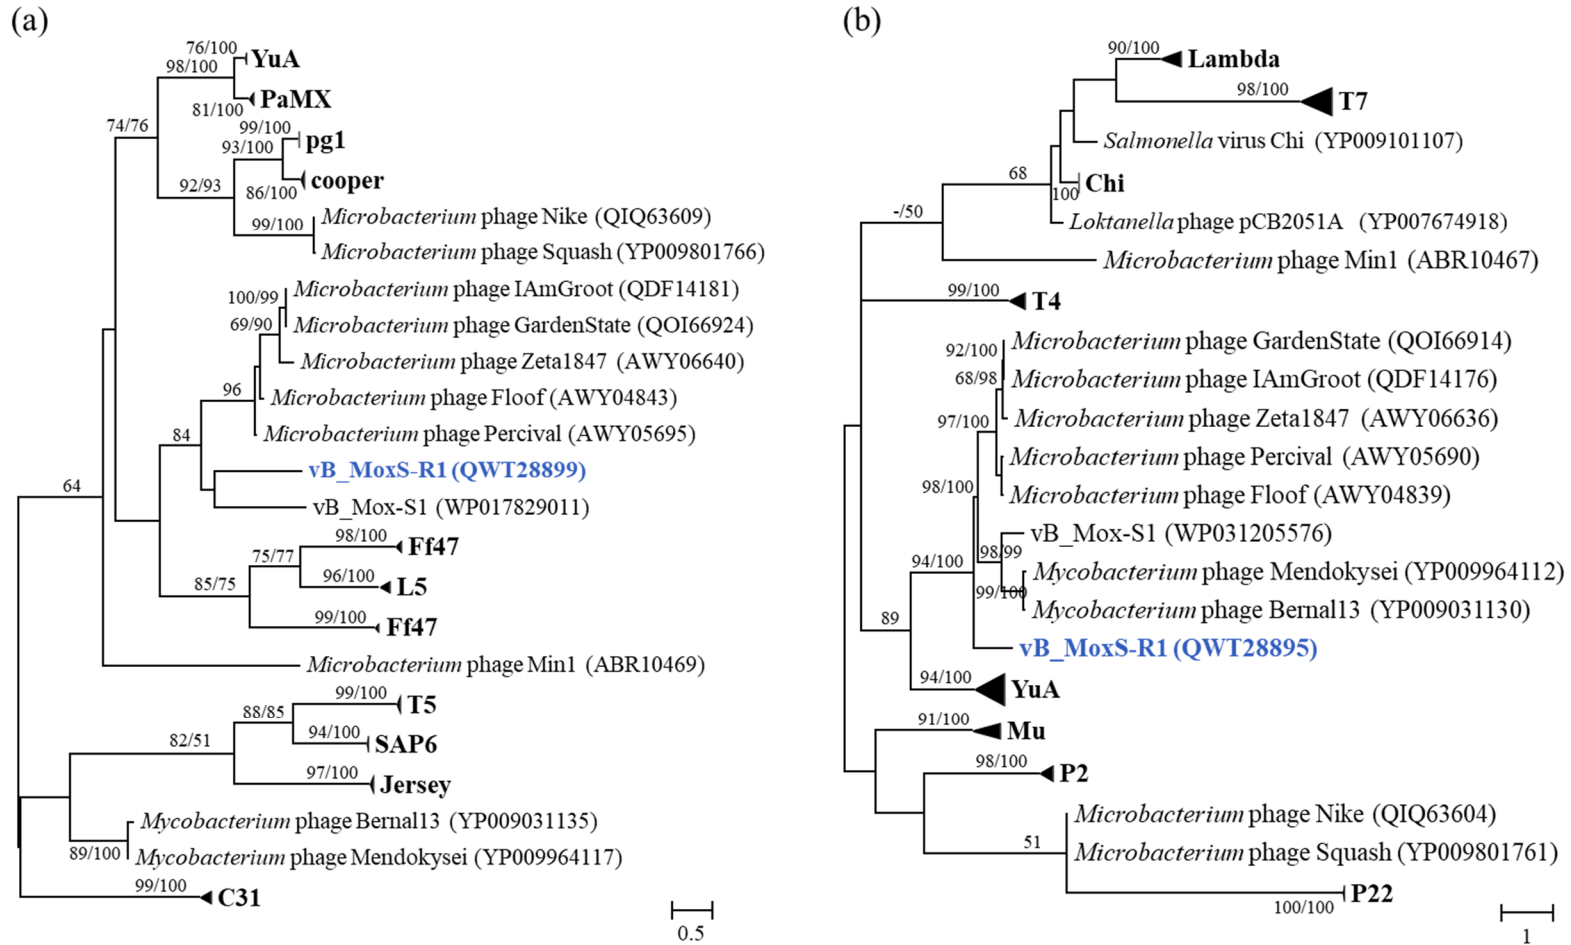

Figure S3. Phylogenetic trees of the major capsid protein **(a)** and terminase large subunit **(b)** of vB\_MoxS-R1 and other known phages. The bootstrap values of (Maximum-likelihood/Neighbor-joining) are shown near each node. Number of bootstrap replicates = 1000. The phage clusters used in the major capsid protein phylogenetic analyses referenced the siphophage clusters used in the phage gene phylogenetic analyses in Zhan et al. (2016) [134] and Yang et al. (2017) [135]. The phage clusters used in the terminase large subunit phylogenetic analyses referenced the phage clusters employed in the phage terminase large subunit phylogenetic analyses in Huang et al. (2012) [136].

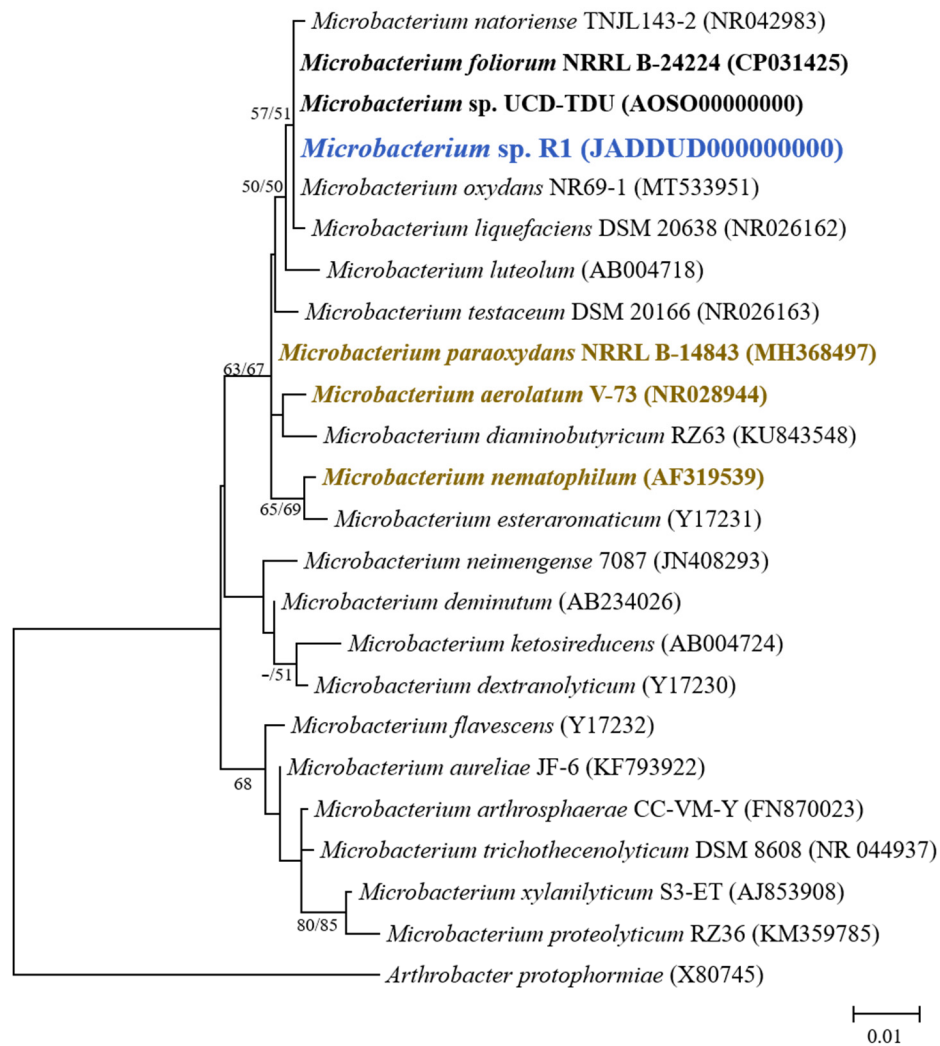

Figure S4. Maximum-likelihood tree constructed using bacterial 16S rRNA sequences. The bootstrap values (Maximum-likelihood/Neighbor-joining) are shown near each node. Number of bootstrap replicates = 1000. The *Microbacterium* hosts of the EH-cluster phages and temperate phage Min 1 include *Microbacterium foliorum*, *Microbacterium paraoxydans*, *Microbacterium aerolatum* and *Microbacterium neimengense*. The 16S rRNA sequences of *Microbacterium paraoxydans* NWU1 and *Microbacterium aerolatum* NRRL B-24228 were not available; therefore, type-strain sequences of the same species were used in the analyses. *Arthrobacter protophormiae* was used as the outgroup. The host of the vB\_MoxS-R1 is indicated in blue. Host bacterial strains of the inducible or predicted prophages are indicated in bold, and type strains of unavailable species are indicated in brown.



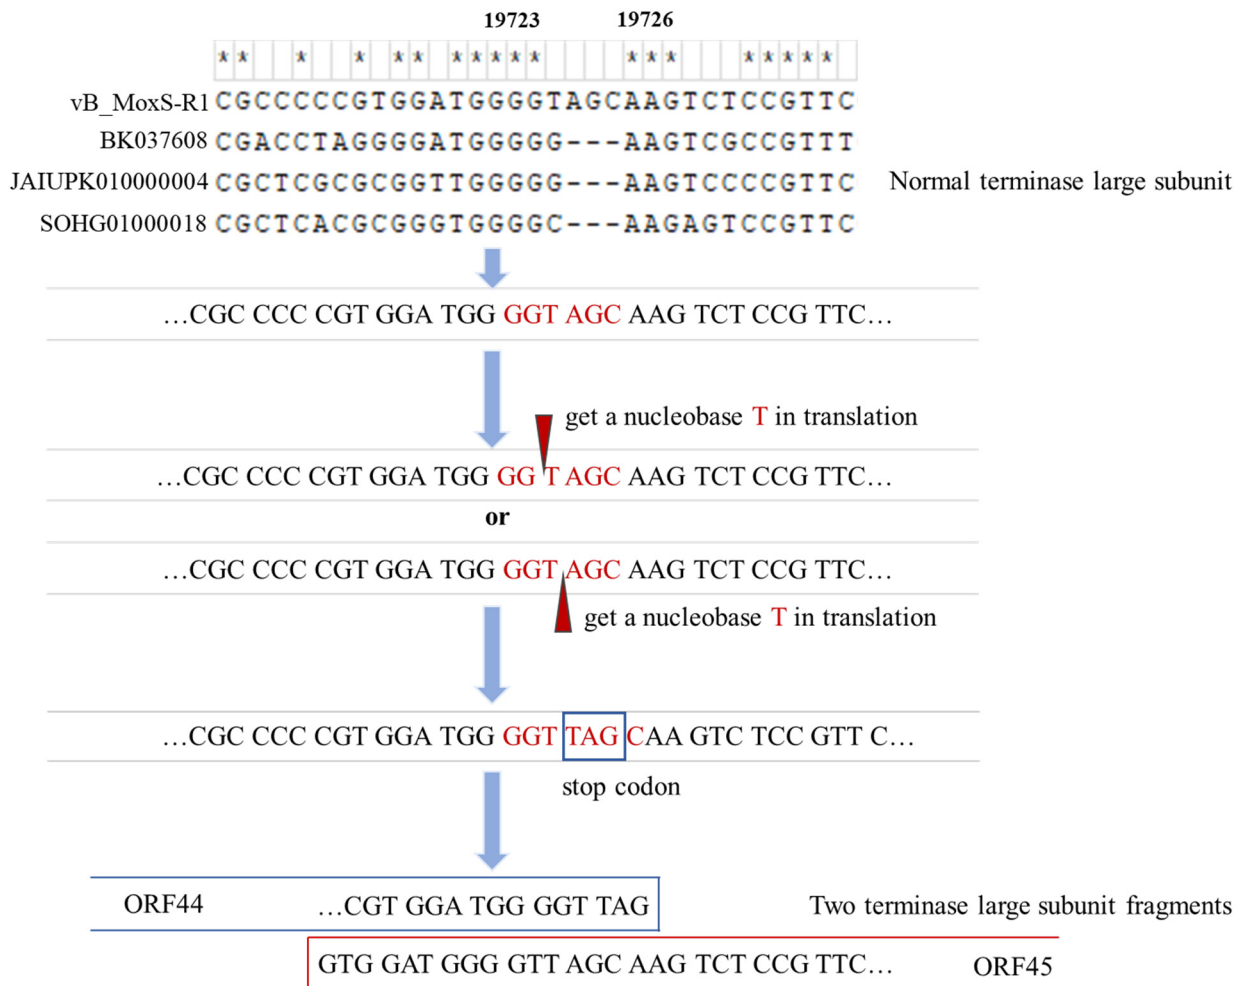

Figure S5. The predicted -1 frameshift in the vB\_MoxS-R1 terminase large-subunit gene.
